# Supplementary material
Source: publisher figshare collection journal article supplement (https://acs.figshare.com/ndownloader/files/5341672)
Supplement: Supplementary file 1 [file 5341672]

  
data_cd22294 
  
_audit_creation_method            SHELXL-97 
_chemical_name_systematic 
; 
 ? 
; 
_chemical_name_common             ? 
_chemical_melting_point           ? 
_chemical_formula_moiety          ? 
_chemical_formula_sum 
 'C23 H18 Cl N2 Ni P' 
_chemical_formula_weight          447.52 
  
loop_ 
 _atom_type_symbol 
 _atom_type_description 
 _atom_type_scat_dispersion_real 
 _atom_type_scat_dispersion_imag 
 _atom_type_scat_source 
 'C'  'C'   0.0033   0.0016 
 'International Tables Vol C Tables 4.2.6.8 and 6.1.1.4' 
 'H'  'H'   0.0000   0.0000 
 'International Tables Vol C Tables 4.2.6.8 and 6.1.1.4' 
 'N'  'N'   0.0061   0.0033 
 'International Tables Vol C Tables 4.2.6.8 and 6.1.1.4' 
 'P'  'P'   0.1023   0.0942 
 'International Tables Vol C Tables 4.2.6.8 and 6.1.1.4' 
 'Cl'  'Cl'   0.1484   0.1585 
 'International Tables Vol C Tables 4.2.6.8 and 6.1.1.4' 
 'Ni'  'Ni'   0.3393   1.1124 
 'International Tables Vol C Tables 4.2.6.8 and 6.1.1.4' 
  
_symmetry_cell_setting            Orthorhombic 
_symmetry_space_group_name_H-M    Pna2(1) 
  
loop_ 
 _symmetry_equiv_pos_as_xyz 
 'x, y, z' 
 '-x, -y, z+1/2' 
 'x+1/2, -y+1/2, z' 
 '-x+1/2, y+1/2, z+1/2' 
  
_cell_length_a                    18.7870(18) 
_cell_length_b                    8.8927(9) 
_cell_length_c                    11.8928(12) 
_cell_angle_alpha                 90.00 
_cell_angle_beta                  90.00 
_cell_angle_gamma                 90.00 
_cell_volume                      1986.9(3) 
_cell_formula_units_Z             4 
_cell_measurement_temperature     293(2) 
_cell_measurement_reflns_used     909 
_cell_measurement_theta_min       5.068 
_cell_measurement_theta_max       34.349 
  
_exptl_crystal_description        prismatic 
_exptl_crystal_colour             red 
_exptl_crystal_size_max           0.358 
_exptl_crystal_size_mid           0.229 
_exptl_crystal_size_min           0.035 
_exptl_crystal_density_meas       ? 
_exptl_crystal_density_diffrn     1.496 
_exptl_crystal_density_method     'not measured' 
_exptl_crystal_F_000              920 
_exptl_absorpt_coefficient_mu     1.202 
_exptl_absorpt_correction_type    empirical 
_exptl_absorpt_correction_T_min   0.69291 
_exptl_absorpt_correction_T_max   1.00000 
_exptl_absorpt_process_details    sadabs 
  
_exptl_special_details 
; 
 ? 
; 
  
_diffrn_ambient_temperature       293(2) 
_diffrn_radiation_wavelength      0.71073 
_diffrn_radiation_type            MoK\a 
_diffrn_radiation_source          'fine-focus sealed tube' 
_diffrn_radiation_monochromator   graphite 
_diffrn_measurement_device_type   'CCD area detector' 
_diffrn_measurement_method        'phi and omega scans' 
_diffrn_detector_area_resol_mean  ? 
_diffrn_standards_number          ? 
_diffrn_standards_interval_count  ? 
_diffrn_standards_interval_time   ? 
_diffrn_standards_decay_%         ? 
_diffrn_reflns_number             11598 
_diffrn_reflns_av_R_equivalents   0.0931 
_diffrn_reflns_av_sigmaI/netI     0.1983 
_diffrn_reflns_limit_h_min        -24 
_diffrn_reflns_limit_h_max        24 
_diffrn_reflns_limit_k_min        -9 
_diffrn_reflns_limit_k_max        11 
_diffrn_reflns_limit_l_min        -14 
_diffrn_reflns_limit_l_max        15 
_diffrn_reflns_theta_min          2.17 
_diffrn_reflns_theta_max          28.26 
_reflns_number_total              4420 
_reflns_number_gt                 2086 
_reflns_threshold_expression      >2sigma(I) 
  
_computing_data_collection        'Bruker SMART' 
_computing_cell_refinement        'Bruker SMART' 
_computing_data_reduction         'Bruker SHELXTL' 
_computing_structure_solution     'SHELXS-97 (Sheldrick, 1990)' 
_computing_structure_refinement   'SHELXL-97 (Sheldrick, 1997)' 
_computing_molecular_graphics     'Bruker SHELXTL' 
_computing_publication_material   'Bruker SHELXTL' 
  
_refine_special_details 
; 
 Refinement of F^2^ against ALL reflections.  The weighted R-factor wR and 
 goodness of fit S are based on F^2^, conventional R-factors R are based 
 on F, with F set to zero for negative F^2^. The threshold expression of 
 F^2^ > 2sigma(F^2^) is used only for calculating R-factors(gt) etc. and is 
 not relevant to the choice of reflections for refinement.  R-factors based 
 on F^2^ are statistically about twice as large as those based on F, and R- 
 factors based on ALL data will be even larger. 
; 
  
_refine_ls_structure_factor_coef  Fsqd 
_refine_ls_matrix_type            full 
_refine_ls_weighting_scheme       calc 
_refine_ls_weighting_details 
 'calc w=1/[\s^2^(Fo^2^)+(0.0054P)^2^+0.0000P] where P=(Fo^2^+2Fc^2^)/3' 
_atom_sites_solution_primary      direct 
_atom_sites_solution_secondary    difmap 
_atom_sites_solution_hydrogens    geom 
_refine_ls_hydrogen_treatment     constr 
_refine_ls_extinction_method      none 
_refine_ls_extinction_coef        ? 
_refine_ls_abs_structure_details 
 'Flack H D (1983), Acta Cryst. A39, 876-881' 
_refine_ls_abs_structure_Flack    0.02(2) 
_chemical_absolute_configuration  ad 
_refine_ls_number_reflns          4420 
_refine_ls_number_parameters      253 
_refine_ls_number_restraints      1 
_refine_ls_R_factor_all           0.1100 
_refine_ls_R_factor_gt            0.0507 
_refine_ls_wR_factor_ref          0.0826 
_refine_ls_wR_factor_gt           0.0740 
_refine_ls_goodness_of_fit_ref    0.899 
_refine_ls_restrained_S_all       0.899 
_refine_ls_shift/su_max           0.001 
_refine_ls_shift/su_mean          0.000 
  
loop_ 
 _atom_site_label 
 _atom_site_type_symbol 
 _atom_site_fract_x 
 _atom_site_fract_y 
 _atom_site_fract_z 
 _atom_site_U_iso_or_equiv 
 _atom_site_adp_type 
 _atom_site_occupancy 
 _atom_site_symmetry_multiplicity 
 _atom_site_calc_flag 
 _atom_site_refinement_flags 
 _atom_site_disorder_assembly 
 _atom_site_disorder_group 
Ni Ni 0.89429(3) 0.70697(8) 0.57011(9) 0.03180(19) Uani 1 1 d . . . 
P P 0.91296(8) 0.57805(18) 0.71989(17) 0.0314(4) Uani 1 1 d . . . 
Cl Cl 0.78162(7) 0.65734(16) 0.5648(2) 0.0505(4) Uani 1 1 d . . . 
N1 N 0.8942(3) 0.8367(5) 0.4440(5) 0.0387(14) Uani 1 1 d . . . 
N2 N 0.9933(2) 0.7422(4) 0.5684(7) 0.0327(11) Uani 1 1 d . . . 
C1 C 0.8505(4) 0.9027(7) 0.3713(7) 0.047(2) Uani 1 1 d . . . 
H1 H 0.8017 0.8855 0.3681 0.056 Uiso 1 1 calc R . . 
C2 C 0.8867(4) 1.0004(8) 0.3005(7) 0.063(2) Uani 1 1 d . . . 
H2 H 0.8673 1.0600 0.2441 0.076 Uiso 1 1 calc R . . 
C3 C 0.9569(4) 0.9911(8) 0.3309(7) 0.054(2) Uani 1 1 d . . . 
H3 H 0.9948 1.0423 0.2982 0.065 Uiso 1 1 calc R . . 
C4 C 0.9606(4) 0.8902(7) 0.4200(6) 0.0427(18) Uani 1 1 d . . . 
C5 C 1.0145(4) 0.8375(7) 0.4899(6) 0.0385(18) Uani 1 1 d . . . 
H5 H 1.0617 0.8670 0.4820 0.046 Uiso 1 1 calc R . . 
C6 C 1.0409(3) 0.6640(7) 0.6408(6) 0.0298(15) Uani 1 1 d . . . 
C7 C 1.1147(3) 0.6679(7) 0.6325(6) 0.0421(18) Uani 1 1 d . . . 
H7 H 1.1366 0.7249 0.5768 0.050 Uiso 1 1 calc R . . 
C8 C 1.1548(3) 0.5865(8) 0.7073(8) 0.049(2) Uani 1 1 d . . . 
H8 H 1.2042 0.5899 0.7018 0.059 Uiso 1 1 calc R . . 
C9 C 1.1241(3) 0.4997(8) 0.7902(7) 0.050(2) Uani 1 1 d . . . 
H9 H 1.1525 0.4471 0.8408 0.060 Uiso 1 1 calc R . . 
C10 C 1.0508(3) 0.4916(8) 0.7973(6) 0.046(2) Uani 1 1 d . . . 
H10 H 1.0296 0.4294 0.8505 0.055 Uiso 1 1 calc R . . 
C11 C 1.0084(3) 0.5769(7) 0.7247(7) 0.0336(16) Uani 1 1 d . . . 
C12 C 0.8798(4) 0.6590(7) 0.8501(6) 0.0387(18) Uani 1 1 d . . . 
C13 C 0.9241(4) 0.7008(9) 0.9377(7) 0.057(2) Uani 1 1 d . . . 
H13 H 0.9729 0.6842 0.9322 0.068 Uiso 1 1 calc R . . 
C14 C 0.8965(4) 0.7665(9) 1.0325(7) 0.074(3) Uani 1 1 d . . . 
H14 H 0.9264 0.7941 1.0914 0.088 Uiso 1 1 calc R . . 
C15 C 0.8251(4) 0.7912(8) 1.0401(7) 0.069(3) Uani 1 1 d . . . 
H15 H 0.8064 0.8341 1.1050 0.082 Uiso 1 1 calc R . . 
C16 C 0.7811(4) 0.7541(9) 0.9547(8) 0.064(2) Uani 1 1 d . . . 
H16 H 0.7326 0.7738 0.9601 0.076 Uiso 1 1 calc R . . 
C17 C 0.8080(4) 0.6875(8) 0.8603(7) 0.052(2) Uani 1 1 d . . . 
H17 H 0.7774 0.6610 0.8021 0.063 Uiso 1 1 calc R . . 
C18 C 0.8850(3) 0.3841(7) 0.7195(7) 0.0344(16) Uani 1 1 d . . . 
C19 C 0.8508(3) 0.3138(7) 0.8083(6) 0.0412(18) Uani 1 1 d . . . 
H19 H 0.8401 0.3676 0.8732 0.049 Uiso 1 1 calc R . . 
C20 C 0.8323(3) 0.1611(8) 0.8001(7) 0.053(2) Uani 1 1 d . . . 
H20 H 0.8083 0.1141 0.8588 0.063 Uiso 1 1 calc R . . 
C21 C 0.8496(3) 0.0824(8) 0.7060(9) 0.054(2) Uani 1 1 d . . . 
H21 H 0.8375 -0.0187 0.7008 0.064 Uiso 1 1 calc R . . 
C22 C 0.8843(4) 0.1491(9) 0.6200(8) 0.066(3) Uani 1 1 d . . . 
H22 H 0.8967 0.0930 0.5570 0.079 Uiso 1 1 calc R . . 
C23 C 0.9012(3) 0.2994(8) 0.6247(6) 0.050(2) Uani 1 1 d . . . 
H23 H 0.9238 0.3447 0.5640 0.060 Uiso 1 1 calc R . . 
  
loop_ 
 _atom_site_aniso_label 
 _atom_site_aniso_U_11 
 _atom_site_aniso_U_22 
 _atom_site_aniso_U_33 
 _atom_site_aniso_U_23 
 _atom_site_aniso_U_13 
 _atom_site_aniso_U_12 
Ni 0.0280(4) 0.0328(4) 0.0346(4) 0.0006(6) -0.0004(6) -0.0003(4) 
P 0.0262(9) 0.0315(9) 0.0366(11) 0.0019(9) 0.0025(9) -0.0007(7) 
Cl 0.0281(7) 0.0654(11) 0.0580(12) 0.0000(16) -0.0018(13) -0.0014(7) 
N1 0.038(3) 0.031(3) 0.047(4) 0.007(3) -0.001(3) -0.005(3) 
N2 0.030(2) 0.027(3) 0.041(3) 0.009(4) 0.006(4) 0.0004(18) 
C1 0.055(5) 0.031(4) 0.055(6) 0.005(4) -0.004(4) 0.010(3) 
C2 0.083(7) 0.046(5) 0.061(6) 0.011(5) -0.016(5) 0.005(5) 
C3 0.066(6) 0.046(5) 0.049(6) 0.013(4) 0.005(5) -0.005(4) 
C4 0.054(5) 0.036(4) 0.038(5) 0.007(4) -0.001(4) 0.003(4) 
C5 0.041(4) 0.042(4) 0.032(5) 0.003(3) 0.006(3) -0.004(3) 
C6 0.028(4) 0.030(4) 0.030(4) -0.003(3) -0.010(3) 0.002(3) 
C7 0.034(4) 0.046(5) 0.046(5) 0.004(3) -0.002(4) -0.006(4) 
C8 0.020(3) 0.054(5) 0.073(6) 0.004(5) -0.003(4) -0.002(3) 
C9 0.033(4) 0.050(5) 0.068(7) 0.011(4) -0.018(4) 0.011(4) 
C10 0.038(4) 0.047(5) 0.052(6) 0.017(4) -0.006(4) -0.002(3) 
C11 0.021(3) 0.033(4) 0.047(5) -0.001(4) 0.000(4) -0.003(3) 
C12 0.042(4) 0.033(4) 0.041(5) 0.003(3) 0.001(4) 0.003(3) 
C13 0.056(5) 0.075(6) 0.039(5) -0.021(5) 0.006(4) -0.001(4) 
C14 0.070(5) 0.087(7) 0.064(8) -0.016(5) -0.005(5) 0.010(5) 
C15 0.087(6) 0.068(5) 0.051(8) -0.017(5) 0.013(5) 0.018(5) 
C16 0.052(5) 0.082(6) 0.057(7) -0.012(5) 0.010(4) 0.013(4) 
C17 0.045(4) 0.068(6) 0.044(5) -0.011(4) 0.006(4) -0.005(4) 
C18 0.024(3) 0.037(4) 0.042(5) 0.007(4) -0.003(4) -0.006(3) 
C19 0.046(4) 0.035(4) 0.043(5) 0.005(4) 0.008(4) -0.006(3) 
C20 0.041(4) 0.043(5) 0.075(7) 0.000(4) 0.017(4) -0.013(4) 
C21 0.045(4) 0.032(4) 0.084(7) -0.006(5) 0.001(5) -0.003(4) 
C22 0.068(5) 0.042(5) 0.088(9) -0.033(4) 0.017(5) 0.001(4) 
C23 0.051(4) 0.048(4) 0.051(5) -0.005(4) 0.013(4) -0.004(4) 
  
_geom_special_details 
; 
 All esds (except the esd in the dihedral angle between two l.s. planes) 
 are estimated using the full covariance matrix.  The cell esds are taken 
 into account individually in the estimation of esds in distances, angles 
 and torsion angles; correlations between esds in cell parameters are only 
 used when they are defined by crystal symmetry.  An approximate (isotropic) 
 treatment of cell esds is used for estimating esds involving l.s. planes. 
; 
  
loop_ 
 _geom_bond_atom_site_label_1 
 _geom_bond_atom_site_label_2 
 _geom_bond_distance 
 _geom_bond_site_symmetry_2 
 _geom_bond_publ_flag 
Ni N2 1.887(4) . ? 
Ni N1 1.892(5) . ? 
Ni P 2.147(2) . ? 
Ni Cl 2.1631(15) . ? 
P C11 1.794(5) . ? 
P C18 1.804(6) . ? 
P C12 1.818(7) . ? 
N1 C1 1.329(8) . ? 
N1 C4 1.367(8) . ? 
N2 C5 1.322(9) . ? 
N2 C6 1.423(8) . ? 
C1 C2 1.388(10) . ? 
C1 H1 0.9300 . ? 
C2 C3 1.370(9) . ? 
C2 H2 0.9300 . ? 
C3 C4 1.390(10) . ? 
C3 H3 0.9300 . ? 
C4 C5 1.391(9) . ? 
C5 H5 0.9300 . ? 
C6 C7 1.391(8) . ? 
C6 C11 1.403(9) . ? 
C7 C8 1.372(9) . ? 
C7 H7 0.9300 . ? 
C8 C9 1.379(10) . ? 
C8 H8 0.9300 . ? 
C9 C10 1.382(8) . ? 
C9 H9 0.9300 . ? 
C10 C11 1.398(9) . ? 
C10 H10 0.9300 . ? 
C12 C17 1.377(8) . ? 
C12 C13 1.384(9) . ? 
C13 C14 1.373(10) . ? 
C13 H13 0.9300 . ? 
C14 C15 1.362(9) . ? 
C14 H14 0.9300 . ? 
C15 C16 1.351(10) . ? 
C15 H15 0.9300 . ? 
C16 C17 1.367(10) . ? 
C16 H16 0.9300 . ? 
C17 H17 0.9300 . ? 
C18 C19 1.384(9) . ? 
C18 C23 1.389(9) . ? 
C19 C20 1.405(8) . ? 
C19 H19 0.9300 . ? 
C20 C21 1.359(11) . ? 
C20 H20 0.9300 . ? 
C21 C22 1.350(11) . ? 
C21 H21 0.9300 . ? 
C22 C23 1.374(9) . ? 
C22 H22 0.9300 . ? 
C23 H23 0.9300 . ? 
  
loop_ 
 _geom_angle_atom_site_label_1 
 _geom_angle_atom_site_label_2 
 _geom_angle_atom_site_label_3 
 _geom_angle 
 _geom_angle_site_symmetry_1 
 _geom_angle_site_symmetry_3 
 _geom_angle_publ_flag 
N2 Ni N1 83.8(3) . . ? 
N2 Ni P 86.4(2) . . ? 
N1 Ni P 169.52(18) . . ? 
N2 Ni Cl 176.8(2) . . ? 
N1 Ni Cl 95.74(18) . . ? 
P Ni Cl 94.31(8) . . ? 
C11 P C18 106.6(3) . . ? 
C11 P C12 108.5(3) . . ? 
C18 P C12 106.3(3) . . ? 
C11 P Ni 101.1(3) . . ? 
C18 P Ni 117.5(3) . . ? 
C12 P Ni 116.1(2) . . ? 
C1 N1 C4 105.9(6) . . ? 
C1 N1 Ni 141.8(5) . . ? 
C4 N1 Ni 112.2(5) . . ? 
C5 N2 C6 123.5(5) . . ? 
C5 N2 Ni 114.2(5) . . ? 
C6 N2 Ni 122.1(5) . . ? 
N1 C1 C2 111.6(7) . . ? 
N1 C1 H1 124.2 . . ? 
C2 C1 H1 124.2 . . ? 
C3 C2 C1 105.9(7) . . ? 
C3 C2 H2 127.0 . . ? 
C1 C2 H2 127.0 . . ? 
C2 C3 C4 106.7(7) . . ? 
C2 C3 H3 126.6 . . ? 
C4 C3 H3 126.6 . . ? 
N1 C4 C5 115.0(6) . . ? 
N1 C4 C3 109.8(6) . . ? 
C5 C4 C3 135.2(7) . . ? 
N2 C5 C4 114.8(6) . . ? 
N2 C5 H5 122.6 . . ? 
C4 C5 H5 122.6 . . ? 
C7 C6 C11 119.9(6) . . ? 
C7 C6 N2 124.8(6) . . ? 
C11 C6 N2 115.3(5) . . ? 
C8 C7 C6 119.2(6) . . ? 
C8 C7 H7 120.4 . . ? 
C6 C7 H7 120.4 . . ? 
C7 C8 C9 121.9(6) . . ? 
C7 C8 H8 119.0 . . ? 
C9 C8 H8 119.0 . . ? 
C10 C9 C8 119.4(7) . . ? 
C10 C9 H9 120.3 . . ? 
C8 C9 H9 120.3 . . ? 
C9 C10 C11 120.1(7) . . ? 
C9 C10 H10 119.9 . . ? 
C11 C10 H10 119.9 . . ? 
C10 C11 C6 119.4(5) . . ? 
C10 C11 P 126.3(6) . . ? 
C6 C11 P 114.1(5) . . ? 
C17 C12 C13 118.3(7) . . ? 
C17 C12 P 118.9(6) . . ? 
C13 C12 P 122.7(6) . . ? 
C14 C13 C12 120.3(7) . . ? 
C14 C13 H13 119.8 . . ? 
C12 C13 H13 119.8 . . ? 
C15 C14 C13 119.7(8) . . ? 
C15 C14 H14 120.1 . . ? 
C13 C14 H14 120.1 . . ? 
C16 C15 C14 120.9(8) . . ? 
C16 C15 H15 119.6 . . ? 
C14 C15 H15 119.6 . . ? 
C15 C16 C17 119.8(7) . . ? 
C15 C16 H16 120.1 . . ? 
C17 C16 H16 120.1 . . ? 
C16 C17 C12 121.0(7) . . ? 
C16 C17 H17 119.5 . . ? 
C12 C17 H17 119.5 . . ? 
C19 C18 C23 118.4(6) . . ? 
C19 C18 P 124.4(6) . . ? 
C23 C18 P 117.2(6) . . ? 
C18 C19 C20 119.9(7) . . ? 
C18 C19 H19 120.1 . . ? 
C20 C19 H19 120.1 . . ? 
C21 C20 C19 119.7(7) . . ? 
C21 C20 H20 120.2 . . ? 
C19 C20 H20 120.2 . . ? 
C22 C21 C20 120.8(7) . . ? 
C22 C21 H21 119.6 . . ? 
C20 C21 H21 119.6 . . ? 
C21 C22 C23 120.5(7) . . ? 
C21 C22 H22 119.7 . . ? 
C23 C22 H22 119.7 . . ? 
C22 C23 C18 120.6(7) . . ? 
C22 C23 H23 119.7 . . ? 
C18 C23 H23 119.7 . . ? 
  
loop_ 
 _geom_torsion_atom_site_label_1 
 _geom_torsion_atom_site_label_2 
 _geom_torsion_atom_site_label_3 
 _geom_torsion_atom_site_label_4 
 _geom_torsion 
 _geom_torsion_site_symmetry_1 
 _geom_torsion_site_symmetry_2 
 _geom_torsion_site_symmetry_3 
 _geom_torsion_site_symmetry_4 
 _geom_torsion_publ_flag 
N2 Ni P C11 -7.0(3) . . . . ? 
N1 Ni P C11 -26.7(10) . . . . ? 
Cl Ni P C11 169.9(2) . . . . ? 
N2 Ni P C18 -122.5(3) . . . . ? 
N1 Ni P C18 -142.2(10) . . . . ? 
Cl Ni P C18 54.4(2) . . . . ? 
N2 Ni P C12 110.2(3) . . . . ? 
N1 Ni P C12 90.5(10) . . . . ? 
Cl Ni P C12 -72.9(2) . . . . ? 
N2 Ni N1 C1 -177.2(8) . . . . ? 
P Ni N1 C1 -157.3(7) . . . . ? 
Cl Ni N1 C1 6.0(8) . . . . ? 
N2 Ni N1 C4 -2.0(5) . . . . ? 
P Ni N1 C4 17.8(13) . . . . ? 
Cl Ni N1 C4 -178.8(4) . . . . ? 
N1 Ni N2 C5 2.5(5) . . . . ? 
P Ni N2 C5 -174.0(5) . . . . ? 
Cl Ni N2 C5 84(4) . . . . ? 
N1 Ni N2 C6 -173.5(6) . . . . ? 
P Ni N2 C6 10.1(5) . . . . ? 
Cl Ni N2 C6 -92(4) . . . . ? 
C4 N1 C1 C2 -0.8(8) . . . . ? 
Ni N1 C1 C2 174.5(6) . . . . ? 
N1 C1 C2 C3 1.2(9) . . . . ? 
C1 C2 C3 C4 -1.0(9) . . . . ? 
C1 N1 C4 C5 178.2(6) . . . . ? 
Ni N1 C4 C5 1.3(7) . . . . ? 
C1 N1 C4 C3 0.1(8) . . . . ? 
Ni N1 C4 C3 -176.7(5) . . . . ? 
C2 C3 C4 N1 0.6(9) . . . . ? 
C2 C3 C4 C5 -176.9(8) . . . . ? 
C6 N2 C5 C4 173.5(6) . . . . ? 
Ni N2 C5 C4 -2.4(8) . . . . ? 
N1 C4 C5 N2 0.7(9) . . . . ? 
C3 C4 C5 N2 178.1(8) . . . . ? 
C5 N2 C6 C7 -5.7(11) . . . . ? 
Ni N2 C6 C7 169.9(5) . . . . ? 
C5 N2 C6 C11 175.1(7) . . . . ? 
Ni N2 C6 C11 -9.3(9) . . . . ? 
C11 C6 C7 C8 -0.4(10) . . . . ? 
N2 C6 C7 C8 -179.5(7) . . . . ? 
C6 C7 C8 C9 0.5(12) . . . . ? 
C7 C8 C9 C10 1.3(12) . . . . ? 
C8 C9 C10 C11 -3.3(12) . . . . ? 
C9 C10 C11 C6 3.5(11) . . . . ? 
C9 C10 C11 P 178.7(6) . . . . ? 
C7 C6 C11 C10 -1.6(10) . . . . ? 
N2 C6 C11 C10 177.6(6) . . . . ? 
C7 C6 C11 P -177.4(5) . . . . ? 
N2 C6 C11 P 1.8(8) . . . . ? 
C18 P C11 C10 -47.6(8) . . . . ? 
C12 P C11 C10 66.5(7) . . . . ? 
Ni P C11 C10 -170.9(6) . . . . ? 
C18 P C11 C6 127.9(5) . . . . ? 
C12 P C11 C6 -118.0(6) . . . . ? 
Ni P C11 C6 4.6(6) . . . . ? 
C11 P C12 C17 172.6(5) . . . . ? 
C18 P C12 C17 -73.1(6) . . . . ? 
Ni P C12 C17 59.6(6) . . . . ? 
C11 P C12 C13 -3.9(7) . . . . ? 
C18 P C12 C13 110.5(6) . . . . ? 
Ni P C12 C13 -116.9(6) . . . . ? 
C17 C12 C13 C14 1.1(12) . . . . ? 
P C12 C13 C14 177.6(6) . . . . ? 
C12 C13 C14 C15 -0.3(13) . . . . ? 
C13 C14 C15 C16 -1.1(13) . . . . ? 
C14 C15 C16 C17 1.6(13) . . . . ? 
C15 C16 C17 C12 -0.8(13) . . . . ? 
C13 C12 C17 C16 -0.6(11) . . . . ? 
P C12 C17 C16 -177.2(6) . . . . ? 
C11 P C18 C19 110.3(6) . . . . ? 
C12 P C18 C19 -5.3(6) . . . . ? 
Ni P C18 C19 -137.2(5) . . . . ? 
C11 P C18 C23 -67.4(6) . . . . ? 
C12 P C18 C23 176.9(5) . . . . ? 
Ni P C18 C23 45.0(6) . . . . ? 
C23 C18 C19 C20 -1.1(10) . . . . ? 
P C18 C19 C20 -178.9(5) . . . . ? 
C18 C19 C20 C21 1.5(11) . . . . ? 
C19 C20 C21 C22 -0.2(12) . . . . ? 
C20 C21 C22 C23 -1.6(13) . . . . ? 
C21 C22 C23 C18 2.0(12) . . . . ? 
C19 C18 C23 C22 -0.6(11) . . . . ? 
P C18 C23 C22 177.3(6) . . . . ? 
  
_diffrn_measured_fraction_theta_max    0.999 
_diffrn_reflns_theta_full              25.49 
_diffrn_measured_fraction_theta_full   0.999 
_refine_diff_density_max    0.371 
_refine_diff_density_min   -0.292 
_refine_diff_density_rms    0.059 
  
